# Supplementary material for: Accelerated Brain Aging in Schizophrenia: A Longitudinal Pattern Recognition Study
Source: Atypon-hosted journal article supplement (doi:10.1176/appi.ajp.2015.15070922), 2016-02-26
Supplement: appi.ajp.2015.15070922.ds001.pdf [file appi.ajp.2015.15070922.ds001.pdf]

 


Psychiatry Online
